# Supplementary material for: Unexpected photochemistry and charge-transfer complexes of [CB11H12]−carborane
Source: Royal Society of Chemistry journal article supplement (doi:10.1039/b715303a), 2008-01-01
Supplement: b715303a.pdf [file b715303a.pdf]

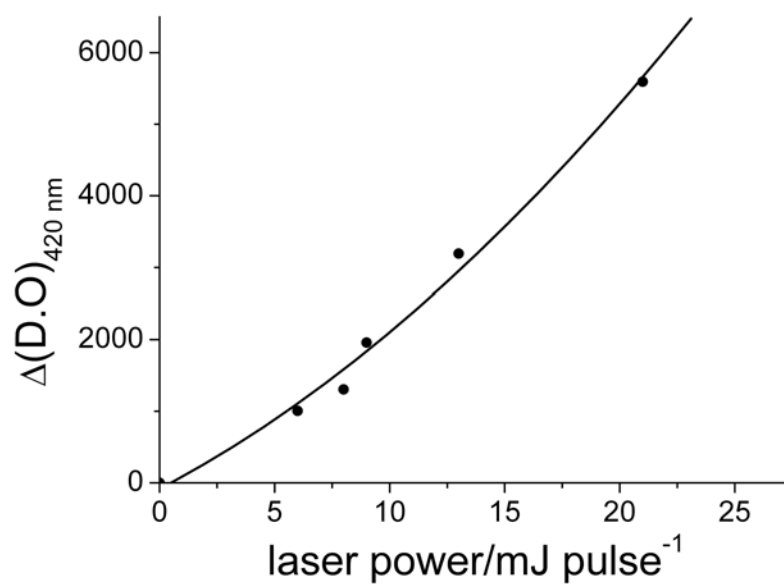

**Fig. S1.** Dependence of the absorption at 420 nm of a Cs[CB<sub>11</sub>H<sub>12</sub>] methanolic solution upon laser power. The solid line corresponds to the best fit obtained with a 2nd-order polynomial function.

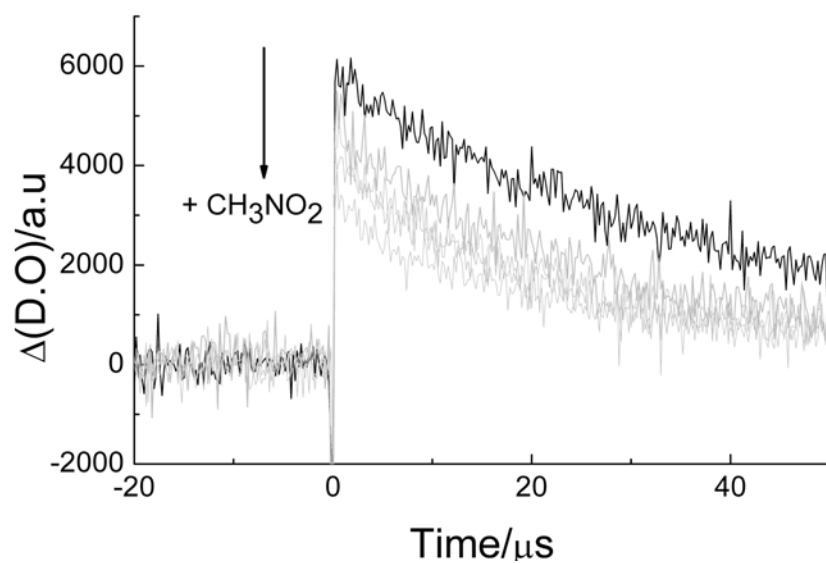

**Table**

| $[\text{CH}_3\text{NO}_2]$ | $\tau(\mu\text{s})$ | $\tau_0/\tau$ |
|----------------------------|---------------------|---------------|
| 0                          | 38                  | 1             |
| 3.50E-04                   | 24.11               | 1.576         |
| 6.99E-04                   | 19.26               | 1.973         |
| 1.39E-03                   | 18.97               | 2.003         |
| 2.09E-03                   | 17.95               | 2.117         |

**Fig. S2.** Quenching of Cs[CB<sub>11</sub>H<sub>12</sub>] with nitromethane. The Figure shows the temporal profiles of the absorption at 420 nm of a Cs[CB<sub>11</sub>H<sub>12</sub>] before (black curve) and after adding increasing amounts of CN<sub>3</sub>NO<sub>2</sub>. The values obtained for the fitting of the curves to first-order exponential decays are shown in the Table.

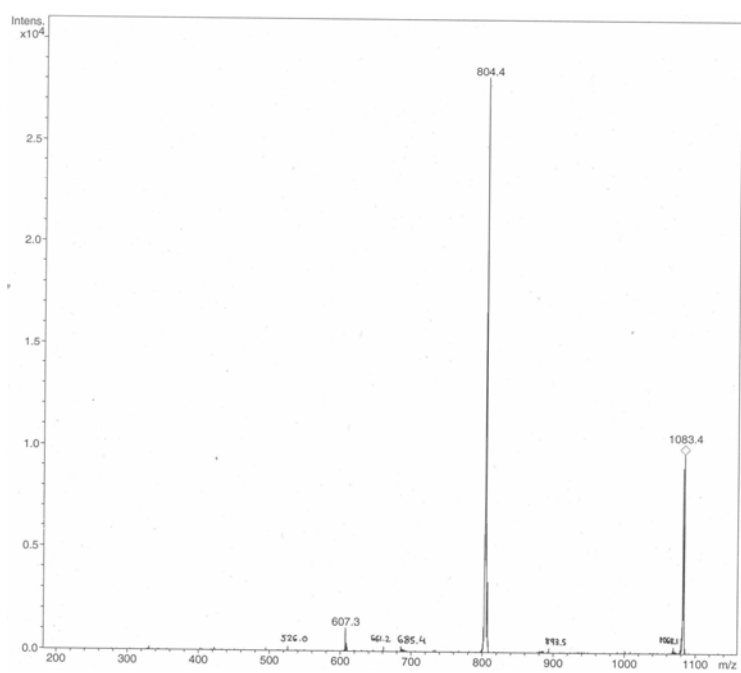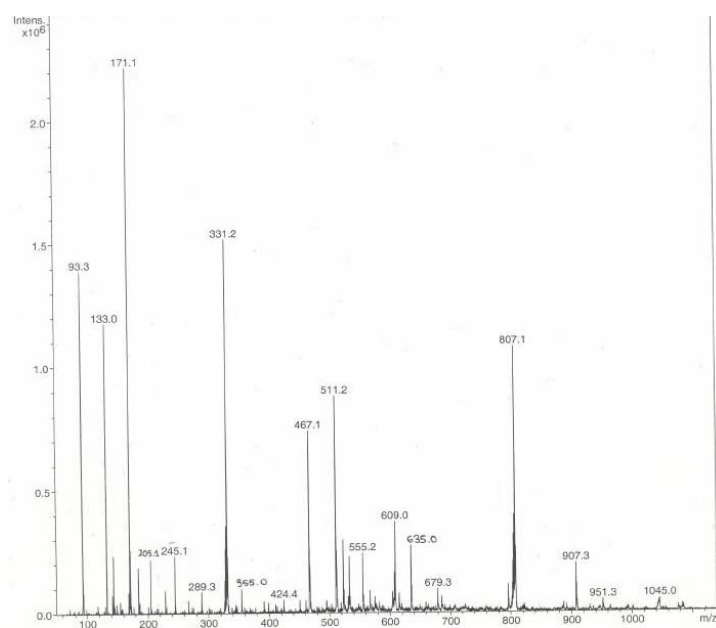

**Fig. S3.** ESI-MS of a coloured equimolar mixture of Cs[CB<sub>11</sub>H<sub>12</sub>] and MV(PF<sub>6</sub>)<sub>2</sub> in acetonitrile.
